# Supplementary material
Source: PubMed Central journal article supplement (PMC2528102)
Supplement: pp.108.121038_3.pdf [file pp.108.121038_3.pdf]

## **Supplementary Data**

**Supplemental Table 1.** Genes cited in the text and corresponding references.

**Supplemental Table 2.** Significant genes changing during CaLCuV infection.

**Supplemental Table 3.** Genes with increased transcripts during RNA virus infection and significantly altered by CaLCuV infection.

**Supplemental Table 4.** Comparisons to host pathogen pathway profiles.

**Supplemental Table 5.** Expression of senescence associated genes.

**Supplemental Table 6.** Photosynthesis-related genes affected by CaLCuV infection.

**Supplemental Table 7.** Primer sets used in this study.

**Supplemental Table 8.** Core cell cycle genes at 9 dpi, PR1 expression in E2FB and CYCB3;1 overexpressors and T-test for ploidy analysis of infected leaves.
