# Supplementary material
Source: PubMed Central journal article supplement (PMC2528102)

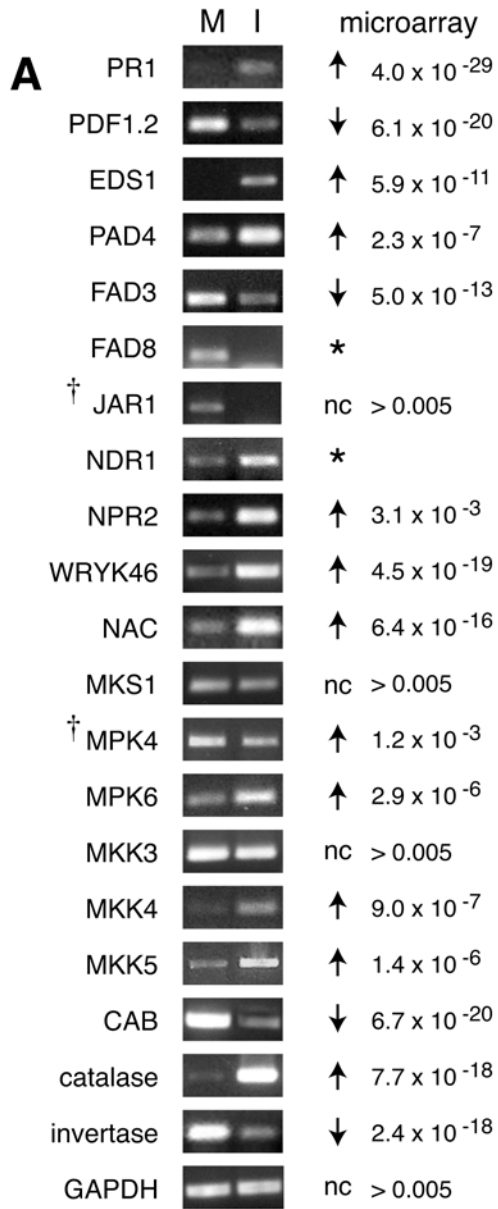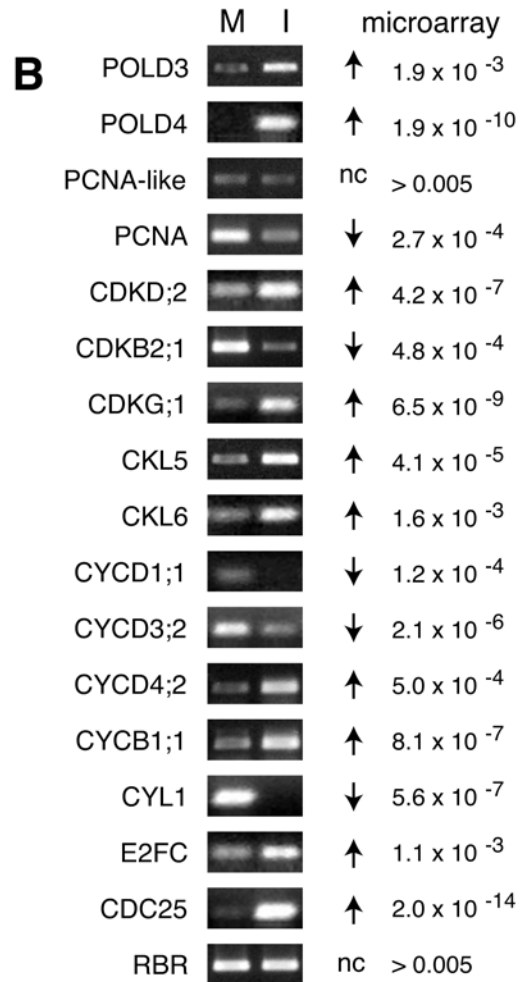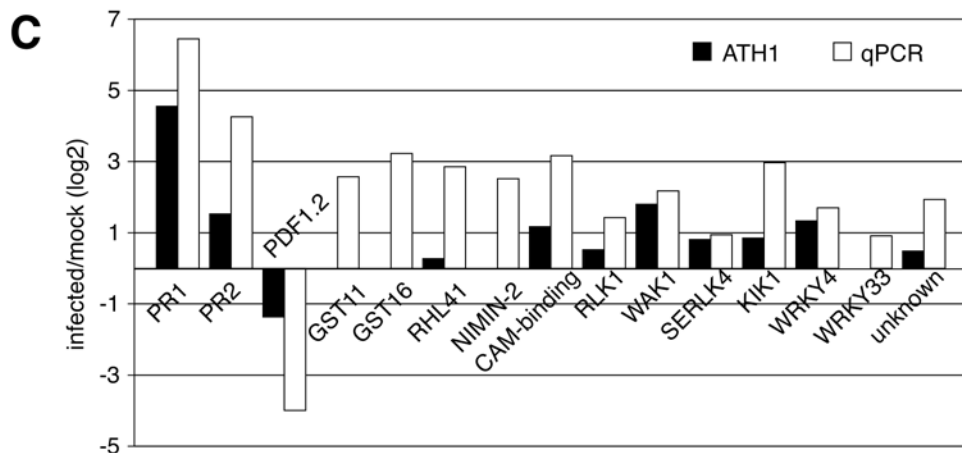

Supplement: pp.108.121038_1.pdf [file pp.108.121038_1.pdf]
